# Supplementary material
Source: Research Square preprint supplement (doi:10.21203/rs.3.rs-9174495/v1)
Supplement: Supplementary file 1 [file fab3713f7f81cee5c9cdbe54.pdf]

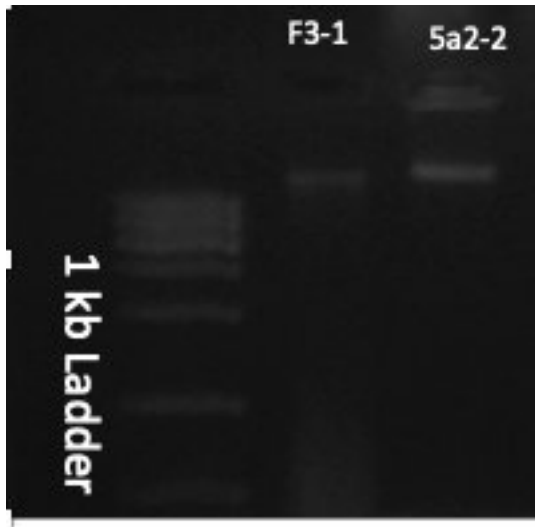

Figure 2: Gel electrophoresis image: 1KB ladder was loaded in first well, lane 5a2-2 corresponds to *Pseudomonas plecoglossicida* MK-6, and lane F3-1 represents a different bacterial isolate.
